# Supplementary material
Source: PubMed Central journal article supplement (PMC3236615)

**A**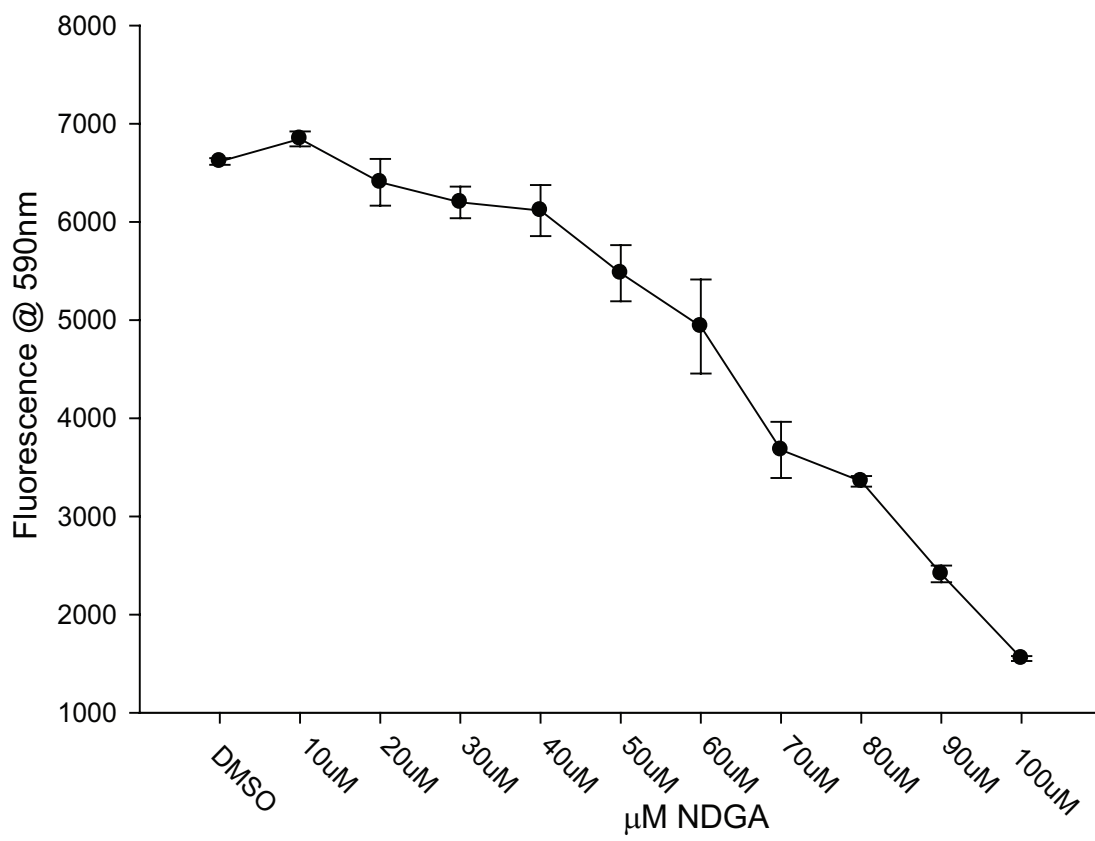**B**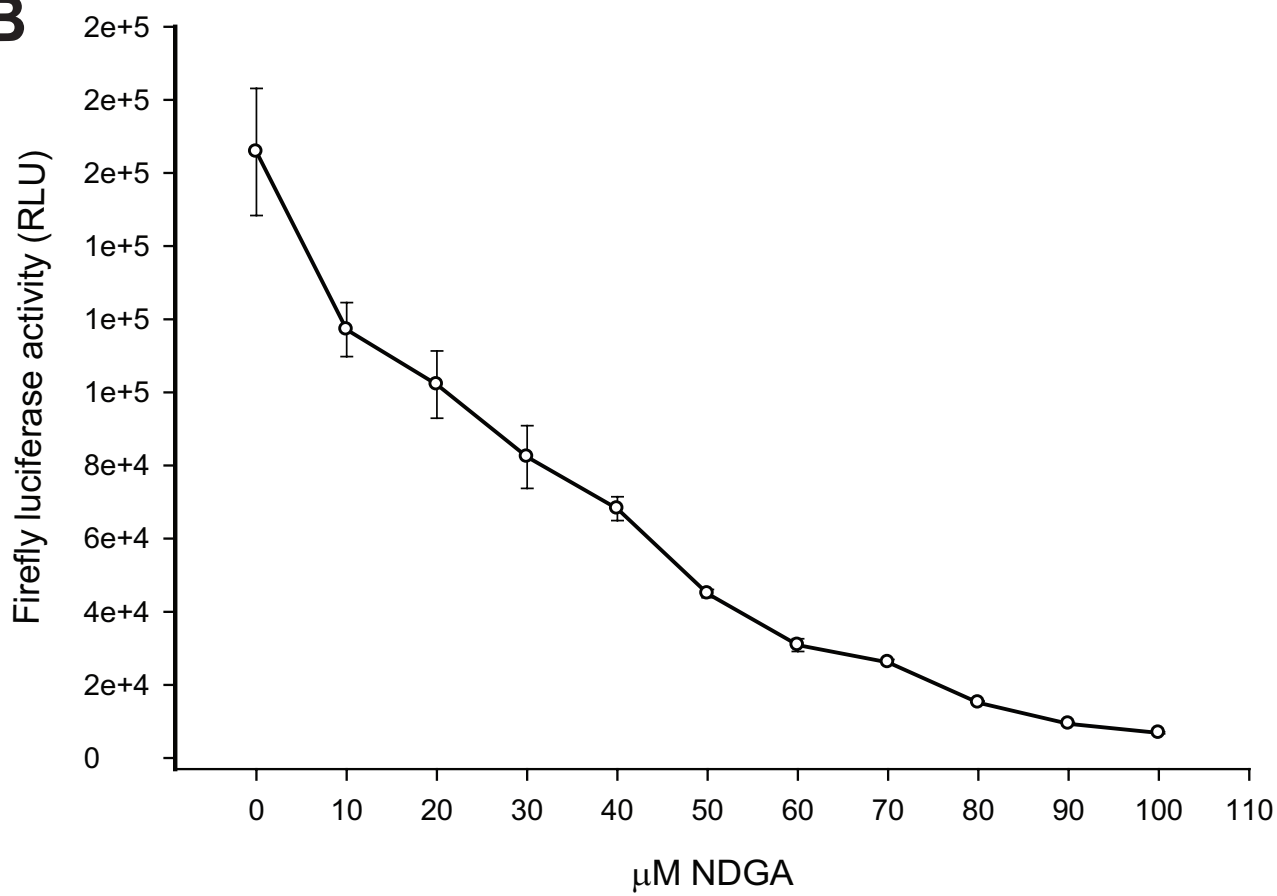

Supplement: NIHMS319109-supplement-Supp_Fig_S1.pdf [file NIHMS319109-supplement-Supp_Fig_S1.pdf]

**Fig. S2**

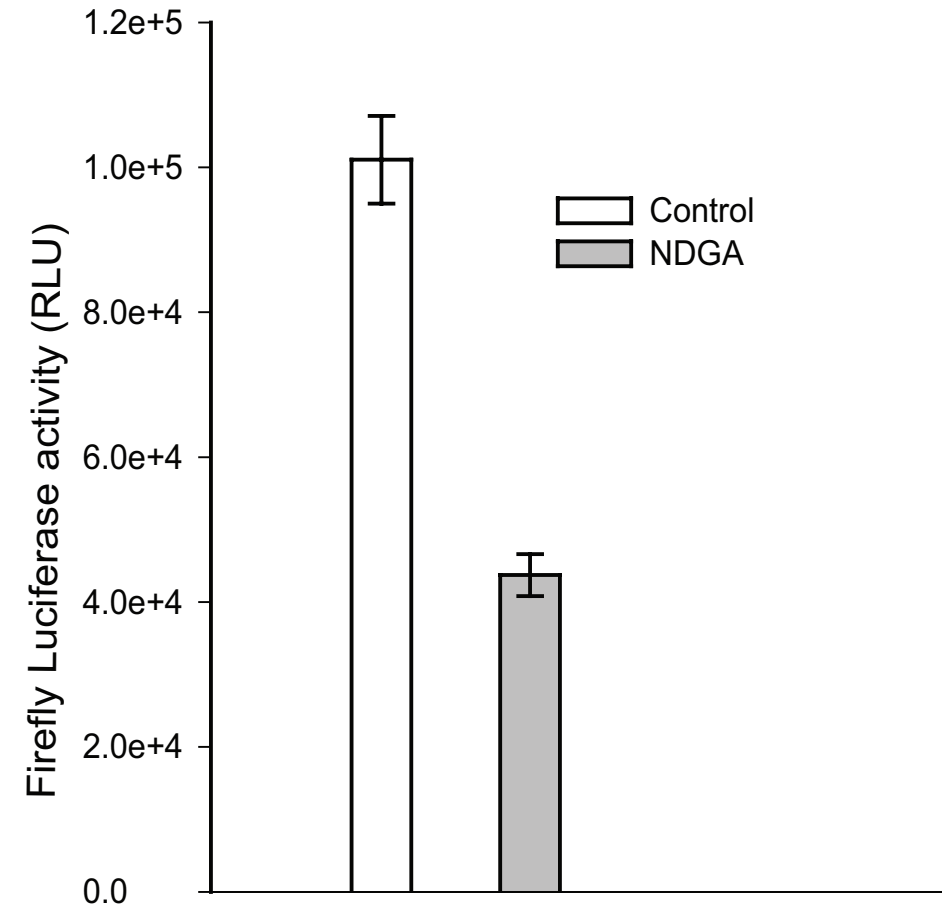

Supplement: NIHMS319109-supplement-Supp_Fig_S2.pdf [file NIHMS319109-supplement-Supp_Fig_S2.pdf]

A

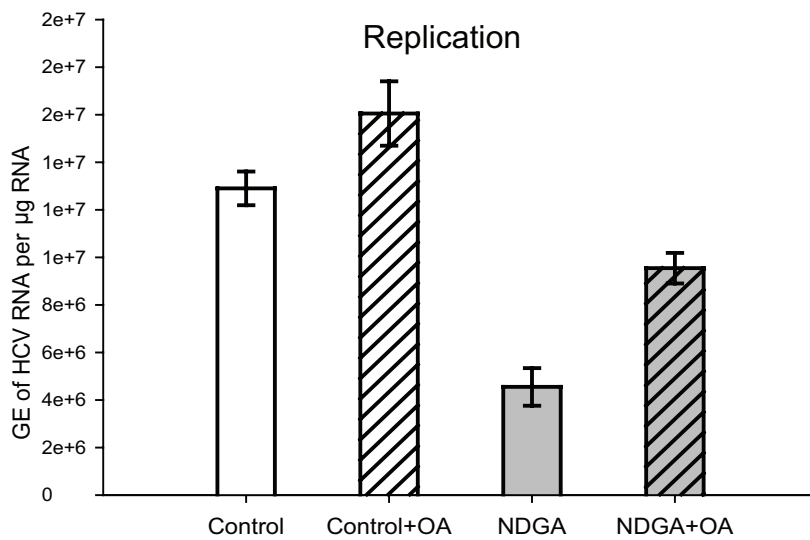

B

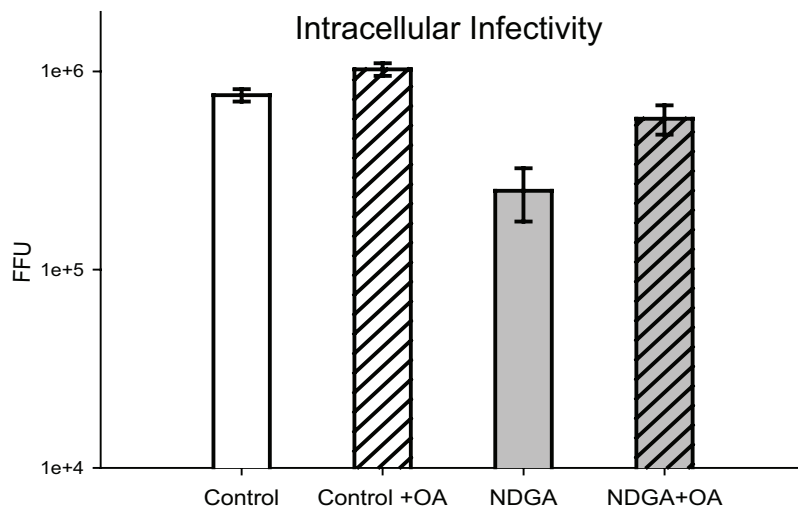

C

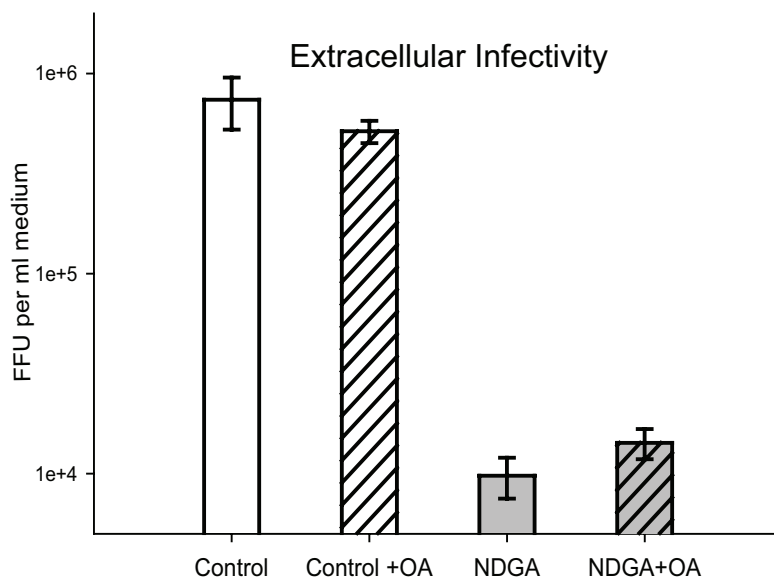

Supplement: NIHMS319109-supplement-Supp_Fig_S3.pdf [file NIHMS319109-supplement-Supp_Fig_S3.pdf]

A

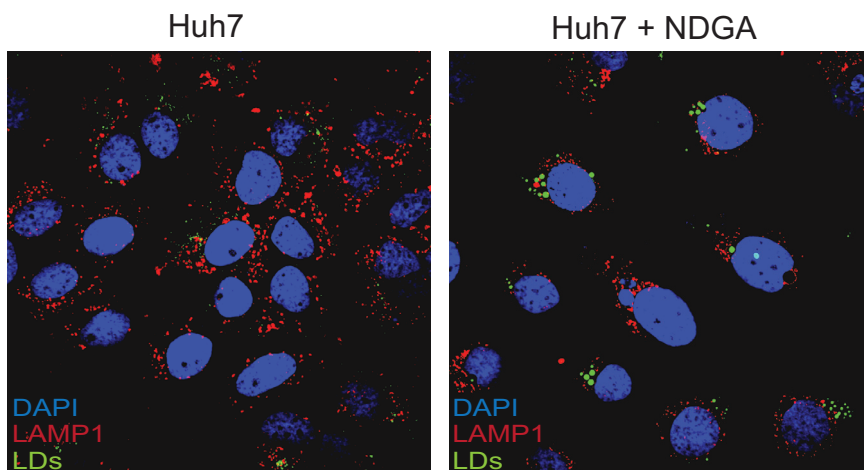

B

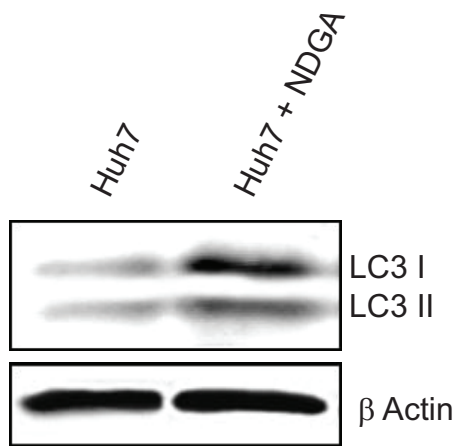

Supplement: NIHMS319109-supplement-Supp_Fig_S4.pdf [file NIHMS319109-supplement-Supp_Fig_S4.pdf]

HCV Core ImmunofluorescenceHCV NS5A Immunofluorescence

JFH

JFH + NDGA

JFH

JFH + NDGA

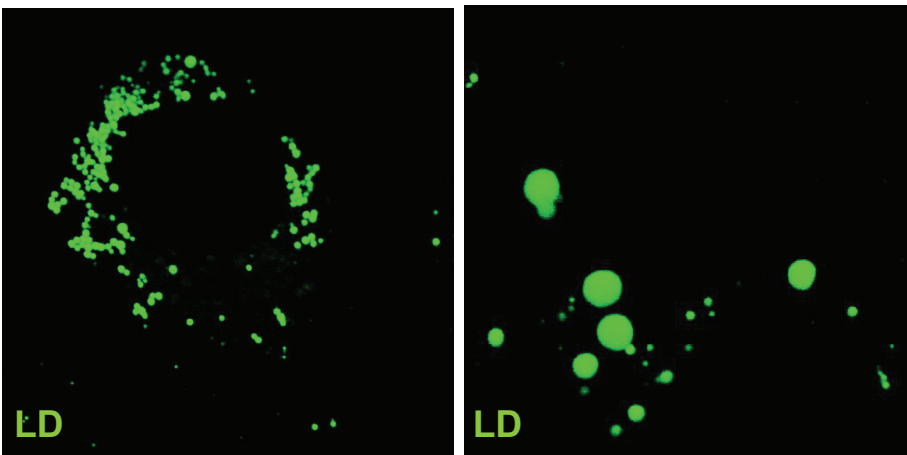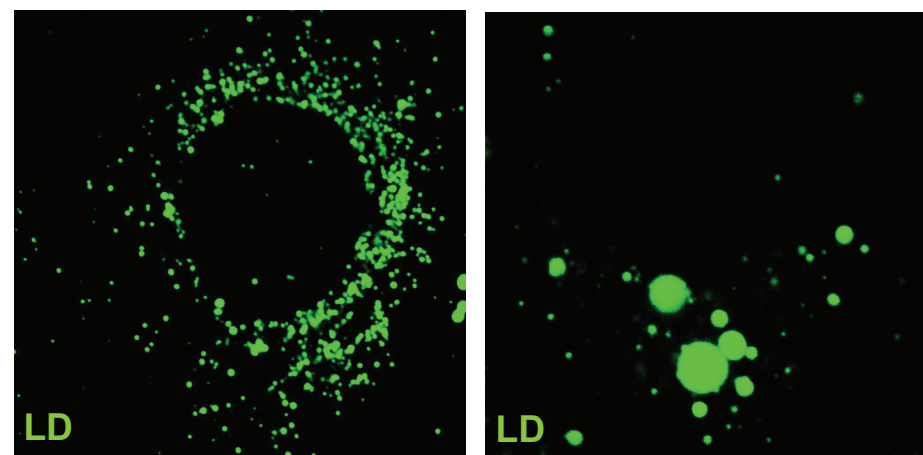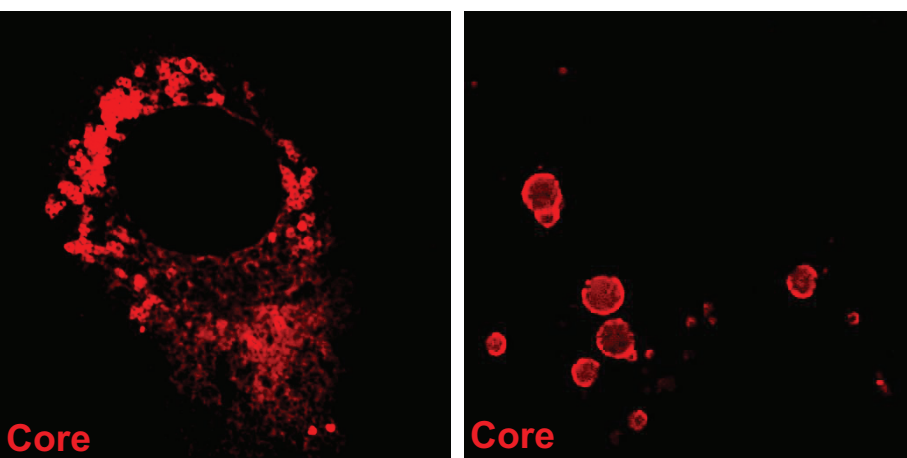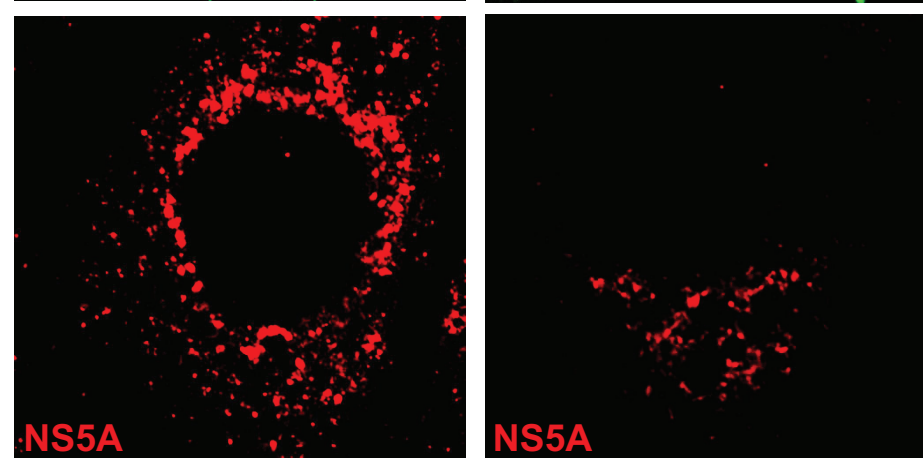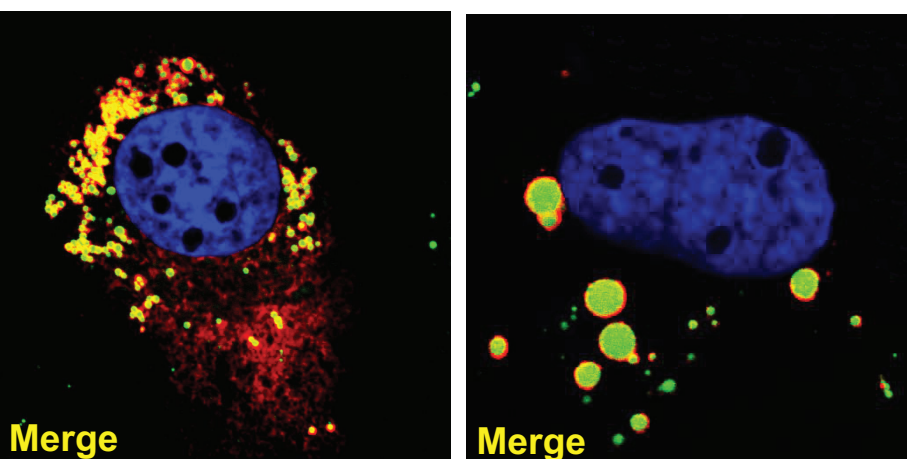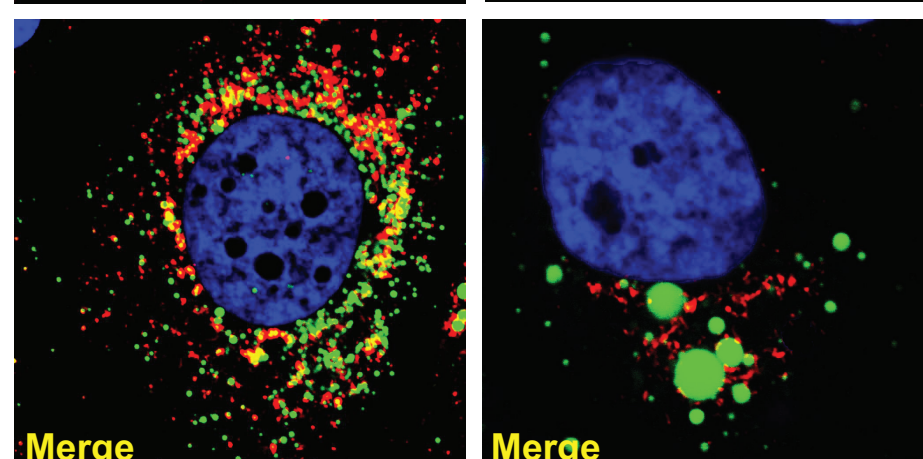

Supplement: NIHMS319109-supplement-Supp_Fig_S5.pdf [file NIHMS319109-supplement-Supp_Fig_S5.pdf]

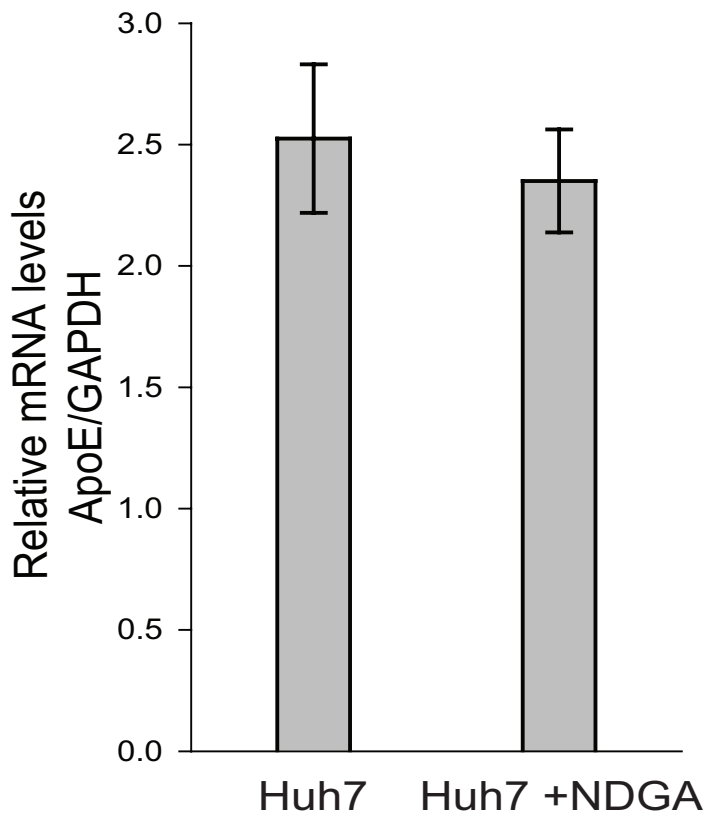

Supplement: NIHMS319109-supplement-Supp_Fig_S6.pdf [file NIHMS319109-supplement-Supp_Fig_S6.pdf]
